# Supplementary material
Source: PubMed Central journal article supplement (PMC5097251)
Supplement: NIHMS713475-supplement-Supplemental_Material.pdf [file NIHMS713475-supplement-Supplemental_Material.pdf]

## **SUPPLEMENTAL MATERIAL**

### **Race, socioeconomic status, and life expectancy after acute myocardial infarction**

Emily M. Bucholz, Shuangge Ma, Sharon-Lise T. Normand, Harlan M. Krumholz

Supplemental Tables – 6

**Table R2.1. Unadjusted hazard ratios for age, race, socioeconomic status (SES), gender and their interactions from the Cox proportional hazards model\***

| <b>Variable</b>                       | <b>Hazard Ratio (95% Confidence Interval)</b> | <b>p-value</b> |
|---------------------------------------|-----------------------------------------------|----------------|
| Age (per 1 year increase from age 65) | 1.08 (1.08-1.08)                              | <0.001         |
| Black race                            | 1.43 (1.32, 1.55)                             | <0.001         |
| Area-level SES                        |                                               |                |
| High                                  | 1.00                                          | --             |
| Medium                                | 1.19 (1.16-1.23)                              | <0.001         |
| Low                                   | 1.38 (1.32-1.45)                              | <0.001         |
| Female sex                            | 0.95 (0.94-0.96)                              | <0.001         |
| Black race*age                        | 0.98 (0.98, 0.98)                             | <0.001         |
| Medium SES*age                        | 0.99 (0.99-0.99)                              | <0.001         |
| Low SES*age                           | 0.99 (0.99-0.99)                              | <0.001         |
| Medium SES*black race                 | 0.99 (0.92-1.08)                              | 0.869          |
| Low SES*black race                    | 0.91 (0.83-0.99)                              | 0.033          |

\*Parameter estimates from this model were used to calculate the expected survival curves for black and white patients with low, medium, and high area-level SES.

**Table S2. Adjusted hazard ratios for age, race, socioeconomic status (SES), gender and their interactions from the Cox proportional hazards model**

| Variable                              | Hazard Ratio (95% Confidence Interval) | p-value |
|---------------------------------------|----------------------------------------|---------|
| Age (per 1 year increase from age 65) | 1.07 (1.06-1.07)                       | <0.001  |
| Black race                            | 1.13 (1.04-1.22)                       | 0.005   |
| Area-level SES                        |                                        |         |
| High                                  | 1.00                                   | --      |
| Medium                                | 1.18 (1.15-1.21)                       | <0.001  |
| Low                                   | 1.35 (1.28-1.41)                       | <0.001  |
| Female sex                            | 0.92 (0.91-0.93)                       | <0.001  |
| Black race*age                        | 0.99 (0.99-0.99)                       | <0.001  |
| Medium SES*age                        | 0.99 (0.99-0.99)                       | <0.001  |
| Low SES*age                           | 0.99 (0.99-0.99)                       | <0.001  |
| Medium SES*black race                 | 0.96 (0.89-1.04)                       | 0.376   |
| Low SES*black race                    | 0.90 (0.82-0.98)                       | 0.022   |

\*Parameter estimates from this model were used to calculate the expected survival curves for black and white patients with low, medium, and high area-level SES.

**Table S3. Percentage of initial cohort still living after 17 years of follow-up.**

| Age | High Socioeconomic Status |            |                |            | Medium Socioeconomic Status |            |                |            | Low Socioeconomic Status |            |                |            |
|-----|---------------------------|------------|----------------|------------|-----------------------------|------------|----------------|------------|--------------------------|------------|----------------|------------|
|     | White Patients            |            | Black Patients |            | White Patients              |            | Black Patients |            | White Patients           |            | Black Patients |            |
|     | Sample Size               | % Censored | Sample Size    | % Censored | Sample Size                 | % Censored | Sample Size    | % Censored | Sample Size              | % Censored | Sample Size    | % Censored |
| 65  | 1025                      | 29.7       | 40             | 22.5       | 3533                        | 24.3       | 246            | 16.3       | 282                      | 19.9       | 108            | 13.9       |
| 66  | 1190                      | 28.3       | 39             | 12.8       | 3880                        | 21.4       | 298            | 14.1       | 278                      | 16.7       | 117            | 14.5       |
| 67  | 1227                      | 26.7       | 41             | 17.1       | 4002                        | 18.3       | 332            | 11.1       | 333                      | 13.8       | 125            | 9.6        |
| 68  | 1290                      | 19.5       | 40             | 5.0        | 4099                        | 16.8       | 307            | 11.4       | 298                      | 14.1       | 130            | 10.0       |
| 69  | 1346                      | 18.7       | 43             | 2.3        | 4316                        | 14.3       | 379            | 8.4        | 348                      | 9.8        | 106            | 10.4       |
| 70  | 1373                      | 17.9       | 37             | 5.4        | 4578                        | 13.0       | 309            | 6.8        | 357                      | 9.0        | 124            | 9.7        |
| 71  | 1396                      | 12.8       | 50             | 6.0        | 4546                        | 10.4       | 299            | 10.0       | 364                      | 8.2        | 129            | 7.0        |
| 72  | 1456                      | 11.4       | 44             | 15.9       | 4582                        | 8.8        | 326            | 6.4        | 375                      | 7.7        | 131            | 5.3        |
| 73  | 1425                      | 10.3       | 36             | 11.1       | 4787                        | 7.9        | 302            | 3.6        | 355                      | 4.8        | 97             | 3.1        |
| 74  | 1546                      | 9.0        | 42             | 4.8        | 4666                        | 6.7        | 298            | 3.7        | 350                      | 5.1        | 103            | 3.9        |
| 75  | 1378                      | 5.4        | 36             | 8.3        | 4432                        | 4.9        | 279            | 4.7        | 330                      | 3.9        | 123            | 4.1        |
| 76  | 1325                      | 5.3        | 40             | 12.5       | 4389                        | 3.5        | 275            | 2.9        | 357                      | 3.9        | 91             | 3.3        |
| 77  | 1373                      | 4.1        | 28             | 3.6        | 4323                        | 2.8        | 248            | 1.6        | 339                      | 2.4        | 85             | 2.4        |
| 78  | 1264                      | 2.2        | 29             | 0          | 4155                        | 1.9        | 212            | 1.9        | 351                      | 1.4        | 88             | 0          |
| 79  | 1225                      | 2.0        | 30             | 3.3        | 4130                        | 1.5        | 224            | 1.3        | 323                      | 1.9        | 100            | 2.0        |
| 80  | 1301                      | 1.6        | 36             | 2.8        | 4188                        | 1.0        | 229            | 2.6        | 358                      | 1.1        | 93             | 5.4        |
| 81  | 1230                      | 1.0        | 34             | 0          | 3989                        | 1.0        | 197            | 3.6        | 295                      | 0          | 92             | 0          |
| 82  | 1082                      | 0.7        | 20             | 5.0        | 3742                        | 0.8        | 195            | 0.5        | 299                      | 0.3        | 79             | 0          |
| 83  | 1034                      | 0.7        | 16             | 0          | 3483                        | 0.5        | 149            | 1.3        | 287                      | 0.7        | 67             | 0          |
| 84  | 1014                      | 0.6        | 12             | 0          | 3119                        | 0.5        | 164            | 0.6        | 257                      | 0.8        | 82             | 0          |
| 85  | 851                       | 0.4        | 18             | 0          | 2854                        | 0.4        | 104            | 1.0        | 216                      | 0          | 60             | 0          |
| 86  | 810                       | 0.1        | 13             | 0          | 2492                        | 0.2        | 114            | 0          | 210                      | 1.0        | 40             | 0          |
| 87  | 703                       | 0.1        | 15             | 0          | 2271                        | 0.2        | 99             | 0          | 199                      | 0.5        | 49             | 0          |
| 88  | 616                       | 0.5        | 9              | 0          | 1902                        | 0.3        | 92             | 1.1        | 129                      | 0          | 37             | 2.7        |
| 89  | 525                       | 0          | 7              | 0          | 1576                        | 0.2        | 73             | 0          | 135                      | 0          | 29             | 0          |
| 90  | 410                       | 0          | 8              | 0          | 1226                        | 0.2        | 66             | 1.5        | 101                      | 0          | 30             | 0          |

**Table S4. Post-myocardial infarction life expectancy estimates by race and socioeconomic status**

| Age | High Socioeconomic Status    |                              | Medium Socioeconomic Status  |                              | Low Socioeconomic Status     |                              |
|-----|------------------------------|------------------------------|------------------------------|------------------------------|------------------------------|------------------------------|
|     | White Patients Mean (95% CI) | Black Patients Mean (95% CI) | White Patients Mean (95% CI) | Black Patients Mean (95% CI) | White Patients Mean (95% CI) | Black Patients Mean (95% CI) |
| 65  | 13.55 (13.31, 13.79)         | 10.25 (9.57, 11.01)          | 11.87 (11.73, 11.99)         | 8.86 (8.52, 9.21)            | 10.54 (10.17, 10.92)         | 8.42 (7.98, 8.89)            |
| 66  | 12.73 (12.51, 12.94)         | 9.72 (9.08, 10.44)           | 11.18 (11.06, 11.3)          | 8.44 (8.14, 8.76)            | 9.94 (9.61, 10.29)           | 8.04 (7.64, 8.48)            |
| 67  | 11.95 (11.75, 12.14)         | 9.22 (8.61, 9.9)             | 10.52 (10.41, 10.63)         | 8.04 (7.76, 8.33)            | 9.37 (9.07, 9.68)            | 7.69 (7.31, 8.09)            |
| 68  | 11.2 (11.02, 11.38)          | 8.73 (8.16, 9.38)            | 9.9 (9.8, 9.99)              | 7.65 (7.4, 7.91)             | 8.82 (8.55, 9.1)             | 7.34 (6.99, 7.71)            |
| 69  | 10.49 (10.33, 10.65)         | 8.27 (7.72, 8.88)            | 9.3 (9.21, 9.39)             | 7.28 (7.05, 7.52)            | 8.3 (8.05, 8.55)             | 7 (6.68, 7.35)               |
| 70  | 9.81 (9.67, 9.95)            | 7.82 (7.3, 8.4)              | 8.73 (8.65, 8.81)            | 6.92 (6.71, 7.14)            | 7.8 (7.58, 8.02)             | 6.68 (6.38, 7)               |
| 71  | 9.16 (9.04, 9.29)            | 7.39 (6.9, 7.94)             | 8.18 (8.11, 8.25)            | 6.58 (6.39, 6.77)            | 7.32 (7.12, 7.52)            | 6.37 (6.09, 6.66)            |
| 72  | 8.55 (8.43, 8.66)            | 6.98 (6.52, 7.5)             | 7.66 (7.59, 7.73)            | 6.24 (6.07, 6.42)            | 6.86 (6.68, 7.04)            | 6.07 (5.8, 6.34)             |
| 73  | 7.96 (7.86, 8.06)            | 6.59 (6.14, 7.09)            | 7.17 (7.1, 7.22)             | 5.92 (5.76, 6.09)            | 6.43 (6.27, 6.59)            | 5.78 (5.53, 6.04)            |
| 74  | 7.4 (7.31, 7.5)              | 6.21 (5.78, 6.69)            | 6.69 (6.64, 6.75)            | 5.61 (5.46, 5.77)            | 6.01 (5.86, 6.16)            | 5.49 (5.26, 5.74)            |
| 75  | 6.88 (6.79, 6.96)            | 5.85 (5.44, 6.3)             | 6.24 (6.19, 6.29)            | 5.32 (5.17, 5.47)            | 5.62 (5.48, 5.75)            | 5.22 (5, 5.46)               |
| 76  | 6.37 (6.29, 6.45)            | 5.5 (5.11, 5.94)             | 5.81 (5.76, 5.86)            | 5.03 (4.89, 5.18)            | 5.24 (5.11, 5.37)            | 4.96 (4.74, 5.19)            |
| 77  | 5.9 (5.82, 5.97)             | 5.17 (4.79, 5.59)            | 5.41 (5.36, 5.45)            | 4.75 (4.61, 4.9)             | 4.88 (4.75, 5)               | 4.71 (4.5, 4.93)             |
| 78  | 5.45 (5.37, 5.52)            | 4.85 (4.49, 5.25)            | 5.02 (4.97, 5.06)            | 4.49 (4.35, 4.63)            | 4.54 (4.42, 4.66)            | 4.46 (4.26, 4.68)            |
| 79  | 5.02 (4.94, 5.09)            | 4.54 (4.2, 4.93)             | 4.65 (4.6, 4.69)             | 4.23 (4.09, 4.38)            | 4.21 (4.09, 4.33)            | 4.23 (4.02, 4.44)            |
| 80  | 4.61 (4.54, 4.68)            | 4.25 (3.92, 4.63)            | 4.3 (4.25, 4.34)             | 3.99 (3.85, 4.13)            | 3.9 (3.78, 4.02)             | 4 (3.8, 4.21)                |
| 81  | 4.23 (4.16, 4.3)             | 3.97 (3.65, 4.34)            | 3.97 (3.92, 4.01)            | 3.75 (3.61, 3.9)             | 3.61 (3.49, 3.72)            | 3.78 (3.58, 3.99)            |
| 82  | 3.87 (3.8, 3.94)             | 3.71 (3.39, 4.06)            | 3.65 (3.61, 3.69)            | 3.53 (3.38, 3.68)            | 3.33 (3.21, 3.44)            | 3.57 (3.37, 3.78)            |
| 83  | 3.53 (3.46, 3.6)             | 3.45 (3.15, 3.79)            | 3.35 (3.31, 3.39)            | 3.31 (3.16, 3.46)            | 3.06 (2.94, 3.18)            | 3.37 (3.16, 3.58)            |
| 84  | 3.22 (3.15, 3.29)            | 3.22 (2.92, 3.55)            | 3.08 (3.04, 3.12)            | 3.11 (2.96, 3.27)            | 2.82 (2.7, 2.94)             | 3.18 (2.98, 3.39)            |
| 85  | 2.92 (2.85, 3)               | 2.99 (2.7, 3.32)             | 2.82 (2.78, 2.86)            | 2.91 (2.76, 3.08)            | 2.59 (2.46, 2.71)            | 3 (2.79, 3.21)               |
| 86  | 2.65 (2.57, 2.72)            | 2.78 (2.5, 3.1)              | 2.58 (2.53, 2.62)            | 2.73 (2.57, 2.89)            | 2.37 (2.25, 2.49)            | 2.82 (2.62, 3.04)            |
| 87  | 2.39 (2.32, 2.46)            | 2.57 (2.3, 2.88)             | 2.34 (2.3, 2.38)             | 2.55 (2.39, 2.72)            | 2.16 (2.04, 2.28)            | 2.65 (2.45, 2.88)            |
| 88  | 2.15 (2.07, 2.22)            | 2.38 (2.11, 2.68)            | 2.13 (2.08, 2.17)            | 2.38 (2.22, 2.55)            | 1.96 (1.84, 2.09)            | 2.49 (2.28, 2.72)            |
| 89  | 1.92 (1.85, 1.99)            | 2.19 (1.94, 2.49)            | 1.92 (1.88, 1.96)            | 2.22 (2.06, 2.39)            | 1.78 (1.66, 1.91)            | 2.33 (2.13, 2.56)            |
| 90  | 1.71 (1.64, 1.78)            | 2.02 (1.77, 2.3)             | 1.73 (1.69, 1.77)            | 2.06 (1.9, 2.24)             | 1.61 (1.5, 1.74)             | 2.19 (1.98, 2.42)            |

**Table S5. Unadjusted white-black differences in life expectancy by socioeconomic status**

| <b>Age</b> | <b>High Socioeconomic Status<br/>Mean (SE)</b> | <b>Medium Socioeconomic Status<br/>Mean (SE)</b> | <b>Low Socioeconomic Status<br/>Mean (SE)</b> |
|------------|------------------------------------------------|--------------------------------------------------|-----------------------------------------------|
| 65         | 3.25 (0.39)                                    | 2.98 (0.19)                                      | 2.15 (0.30)                                   |
| 66         | 2.97 (0.36)                                    | 2.98 (0.17)                                      | 1.90 (0.28)                                   |
| 67         | 2.70 (0.34)                                    | 2.45 (0.15)                                      | 1.65 (0.25)                                   |
| 68         | 2.47 (0.32)                                    | 2.23 (0.14)                                      | 1.48 (0.23)                                   |
| 69         | 2.19 (0.34)                                    | 2.00 (0.13)                                      | 1.24 (0.21)                                   |
| 70         | 2.04 (0.29)                                    | 1.77 (0.11)                                      | 1.07 (0.19)                                   |
| 71         | 1.76 (0.27)                                    | 1.59 (0.10)                                      | 0.95 (0.18)                                   |
| 72         | 1.52 (0.26)                                    | 1.41 (0.10)                                      | 0.78 (0.17)                                   |
| 73         | 1.39 (0.25)                                    | 1.24 (0.09)                                      | 0.64 (0.15)                                   |
| 74         | 1.19 (0.23)                                    | 1.08 (0.08)                                      | 0.52 (0.14)                                   |
| 75         | 0.98 (0.22)                                    | 0.92 (0.08)                                      | 0.39 (0.14)                                   |
| 76         | 0.84 (0.22)                                    | 0.79 (0.08)                                      | 0.25 (0.13)                                   |
| 77         | 0.73 (0.21)                                    | 0.66 (0.08)                                      | 0.18 (0.13)                                   |
| 78         | 0.59 (0.20)                                    | 0.52 (0.08)                                      | 0.07 (0.12)                                   |
| 79         | 0.51 (0.19)                                    | 0.42 (0.08)                                      | -0.01 (0.12)                                  |
| 80         | 0.36 (0.19)                                    | 0.31 (0.08)                                      | -0.09 (0.12)                                  |
| 81         | 0.23 (0.18)                                    | 0.21 (0.08)                                      | -0.17 (0.12)                                  |
| 82         | 0.16 (0.17)                                    | 0.12 (0.08)                                      | -0.25 (0.12)                                  |
| 83         | 0.08 (0.17)                                    | 0.05 (0.08)                                      | -0.31 (0.12)                                  |
| 84         | 0.00 (0.17)                                    | -0.02 (0.08)                                     | -0.34 (0.12)                                  |
| 85         | -0.08 (0.16)                                   | -0.07 (0.08)                                     | -0.4 (0.12)                                   |
| 86         | -0.11 (0.16)                                   | -0.15 (0.09)                                     | -0.45 (0.13)                                  |
| 87         | -0.20 (0.16)                                   | -0.19 (0.09)                                     | -0.49 (0.13)                                  |
| 88         | -0.20 (0.15)                                   | -0.24 (0.09)                                     | -0.53 (0.13)                                  |
| 89         | -0.27 (0.15)                                   | -0.28 (0.09)                                     | -0.55 (0.13)                                  |
| 90         | -0.27 (0.14)                                   | -0.31 (0.09)                                     | -0.57 (0.13)                                  |

**Table S6. Adjusted white-black differences in life expectancy by socioeconomic status**

| <b>Age</b> | <b>High Socioeconomic Status<br/>Mean (SE)</b> | <b>Medium Socioeconomic Status<br/>Mean (SE)</b> | <b>Low Socioeconomic Status<br/>Mean (SE)</b> |
|------------|------------------------------------------------|--------------------------------------------------|-----------------------------------------------|
| 65         | 0.93 (0.34)                                    | 0.59 (0.17)                                      | 0.1 (0.26)                                    |
| 66         | 0.81 (0.32)                                    | 0.5 (0.15)                                       | 0.02 (0.24)                                   |
| 67         | 0.7 (0.3)                                      | 0.4 (0.14)                                       | -0.06 (0.22)                                  |
| 68         | 0.59 (0.29)                                    | 0.32 (0.13)                                      | -0.12 (0.2)                                   |
| 69         | 0.5 (0.27)                                     | 0.24 (0.12)                                      | -0.19 (0.19)                                  |
| 70         | 0.4 (0.26)                                     | 0.16 (0.11)                                      | -0.25 (0.17)                                  |
| 71         | 0.32 (0.25)                                    | 0.09 (0.1)                                       | -0.3 (0.16)                                   |
| 72         | 0.24 (0.23)                                    | 0.02 (0.09)                                      | -0.36 (0.15)                                  |
| 73         | 0.16 (0.22)                                    | -0.04 (0.08)                                     | -0.41 (0.14)                                  |
| 74         | 0.1 (0.22)                                     | -0.1 (0.08)                                      | -0.45 (0.13)                                  |
| 75         | 0.03 (0.21)                                    | -0.16 (0.08)                                     | -0.49 (0.13)                                  |
| 76         | -0.03 (0.2)                                    | -0.21 (0.07)                                     | -0.53 (0.12)                                  |
| 77         | -0.08 (0.2)                                    | -0.25 (0.07)                                     | -0.57 (0.12)                                  |
| 78         | -0.14 (0.19)                                   | -0.3 (0.07)                                      | -0.6 (0.12)                                   |
| 79         | -0.18 (0.19)                                   | -0.34 (0.08)                                     | -0.63 (0.12)                                  |
| 80         | -0.23 (0.18)                                   | -0.38 (0.08)                                     | -0.66 (0.12)                                  |
| 81         | -0.27 (0.18)                                   | -0.41 (0.08)                                     | -0.68 (0.12)                                  |
| 82         | -0.3 (0.17)                                    | -0.44 (0.08)                                     | -0.7 (0.12)                                   |
| 83         | -0.33 (0.17)                                   | -0.47 (0.08)                                     | -0.72 (0.12)                                  |
| 84         | -0.37 (0.17)                                   | -0.49 (0.09)                                     | -0.74 (0.13)                                  |
| 85         | -0.39 (0.17)                                   | -0.52 (0.09)                                     | -0.76 (0.13)                                  |
| 86         | -0.42 (0.16)                                   | -0.54 (0.09)                                     | -0.78 (0.13)                                  |
| 87         | -0.44 (0.16)                                   | -0.56 (0.09)                                     | -0.79 (0.14)                                  |
| 88         | -0.46 (0.16)                                   | -0.57 (0.1)                                      | -0.8 (0.14)                                   |
| 89         | -0.48 (0.16)                                   | -0.59 (0.1)                                      | -0.8 (0.14)                                   |
| 90         | -0.49 (0.16)                                   | -0.6 (0.1)                                       | -0.81 (0.14)                                  |
